# Supplementary material for: Synthesis of cobalt-containing cyclophanes, and the formation of an unprecedented seven-membered cyclic diyneElectronic supplementary information (ESI) available: crystallographic data for complexes 8 and 11. See http://www.rsc.org/suppdata/nj/b3/b310515f/
Source: Royal Society of Chemistry journal article supplement (doi:10.1039/b310515f), 2004-01-01
Supplement: b310515f.doc [file b310515f.doc]

**Supplementary Information**

Crystallographic data for complexes in supplementary information:

| Complex | **8** | **11** |
| --- | --- | --- |
| Empirical formula | C56H44Co2O8P4 | C28H18Co4O14 |
| Weight | 1086.65 | 814.14 |
| Crystal system | Triclinic | Triclinic |
| Crystal size | 0.23x0.23x0.07 | 0.18x0.18x0.07 |
| Space group | P-1 | P-1 |
| a (Å) | 9.0167(6) | 7.9541(6) |
| b (Å) | 10.6153(8) | 8.0955(6) |
| c (Å) | 14.117(1) | 12.432(1) |
| (o) | 80.777(3) | 86.127(5) |
| (o) | 72.910(5) | 85.621(4) |
| (o) | 89.329(4) | 77.462(5) |
| V/Å3 | 1273.9(2) | 778.1(1) |
| Z | 1 | 1 |
| Dc Mg/m3 | 1.416 | 1.738 |
| abs coefficient mm-1 | 0.831 | 2.163 |
| F(000) | 558 | 406 |
|  range/o | 3.54 to 26.80 | 3.59 to 27.49 |
| Index ranges | -11*h*11  -13*k*13  -17*l*17 | -10*h*10  -10*k*10  -13*l*l16 |
| Reflections measured | 10504 | 9736 |
| Independent reflections | 5310 | 3544 |
| Rint | 0.0588 | 0.0619 |
| Goodness of fit on F2 | 0.996 | 1.131 |
| Final R indices  R1  wR2 | 0.535  0.0951 | 0.0473  0.1192 |
| R indices (all data)  R1  wR2 | 0.1118  0.1162 | 0.0638  0.1288 |
| Largest diff peak and hole | 0.569 and –0.474 | 0.938 and –0.731 |

Molecular structure of **8**

Molecular Structure of **11**

**Powder X-ray diffraction data**

**simulated compound 6**

**simulated compound 5**

**bulk powder of crystals grown from acetone/hexane solution**

**bulk powder of crystals grown from dichloromethane/hexane solution**

Plots are intensity (arbitrary units) vs. 2** (º)
